# Supplementary material
Source: PubMed Central journal article supplement (PMC4742331)
Supplement: NIHMS753031-supplement-10549_2016_3686_MOESM1_ESM.pdf [file NIHMS753031-supplement-10549_2016_3686_MOESM1_ESM.pdf]

## Supplementary Materials

### Supplementary Methods

Here we describe the methods for obtaining the overall sensitivity, specificity, AUC, PVP, and PVN of the two-stage approach. First, we obtain the overall sensitivity and specificity as follows. Denote the cutoffs used at the first and second stages as  $c_1$  and  $c_2$ , and  $P(\text{AnyBRCA})$  at these two stages as  $Pr_1$  and  $Pr_2$ , respectively. Consider a specific first-stage tool and denote its sensitivity and specificity at  $c_1$  as  $Se.1 = P(Pr_1 > c_1 | \text{positive genetic test})$  and  $Sp.1 = P(Pr_1 < c_1 | \text{negative genetic test})$ . Further, denote the sensitivity and specificity of the second stage at  $c_2$  given the results of the first stage as  $Se.2|1$  and  $Sp.2|1$ , respectively. These can be estimated by evaluating the subsample of patients with  $Pr_1 > c_1$  who undergo the second stage. A counselee will be considered at high risk overall, and referred for genetic testing, only if  $Pr_1 > c_1$  and  $Pr_2 > c_2$ . Thus, the sensitivity  $Se.O$  and the specificity  $Sp.O$  of the overall two-stage procedure can be calculated as

$$Se.O = P(Pr_2 > c_2 | Pr_1 > c_1, \text{ positive genetic test}) * P(Pr_1 > c_1 | \text{ positive genetic test}) = Se.2|1 * Se.1, \text{ and}$$
$$Sp.O = P(Pr_1 < c_1 | \text{ negative genetic test}) + P(Pr_2 < c_2 | Pr_1 > c_1, \text{ negative genetic test}) * P(Pr_1 > c_1 | \text{ negative genetic test}) = Sp.1 + Sp.2|1 * (1 - Sp.1).$$

By varying the values of  $c_1$  and  $c_2$ , we can get a range of sensitivities and specificities for the two-stage approach. Next, we plot the  $Se.O$  versus  $1 - Sp.O$  over the range of  $c_1$  and  $c_2$  to obtain an empirical ROC curve, and estimate the AUC using trapezoidal rule. Also, we calculate the overall predictive values,  $PVP.O$  and  $PVN.O$  from  $Se.O$  and  $Sp.O$  values by using the Bayes rule. We obtain 95% CI for overall sensitivity, specificity, and predictive values using the bootstrap method [1]. For AUC, we use an asymptotic CI [2,3].

### References

1. Efron B, Tibshirani R: An Introduction to the Bootstrap. Chapman and Hall/CRC 1994.
2. Pepe M: The Statistical Evaluation of Medical Tests for Classification and Prediction. Oxford University Press, 2004
3. Hanley JA, McNeil BJ: The meaning and use of the area under a receiver operating characteristic (ROC) curve. Radiology. 143:29-36, 1982

**Supplement Table 1: First Stage Results (with CI) for NWH data**

|                    | Cutoff | BRCAPRO                        | BRCAPROLYTE                       | BRCAPROLYTE-Plus                 | BRCAPRO-Simple                    |
|--------------------|--------|--------------------------------|-----------------------------------|----------------------------------|-----------------------------------|
| <b>Sensitivity</b> | 0.001  | 0.97 (0.93, 0.99)              | 0.99 (0.97, 1)                    | 0.96 (0.92, 0.99)                | 0.97 (0.93, 0.99)                 |
| <b>Specificity</b> |        | 0.07 (0.05, 0.08)              | 0 (0, 0.01)                       | 0.09 (0.07, 0.1)                 | 0.06 (0.04, 0.07)                 |
| <b>Sensitivity</b> | 0.003  | 0.92 (0.87, 0.96)              | 0.97 (0.93, 0.99)                 | 0.91 (0.86, 0.96)                | 0.93 (0.88, 0.97)                 |
| <b>Specificity</b> |        | 0.17 (0.15, 0.19)              | 0.05 (0.04, 0.07)                 | 0.18 (0.15, 0.2)                 | 0.1 (0.08, 0.12)                  |
| <b>Sensitivity</b> | 0.005  | 0.89 (0.83, 0.94)              | 0.97 (0.93, 0.99)                 | 0.86 (0.79, 0.92)                | 0.9 (0.85, 0.95)                  |
| <b>Specificity</b> |        | 0.22 (0.2, 0.24)               | 0.07 (0.05, 0.08)                 | 0.26 (0.24, 0.28)                | 0.14 (0.13, 0.16)                 |
| <b>Sensitivity</b> | 0.007  | 0.84 (0.77, 0.9)               | 0.96 (0.92, 0.99)                 | 0.8 (0.73, 0.87)                 | 0.89 (0.83, 0.94)                 |
| <b>Specificity</b> |        | 0.27 (0.25, 0.3)               | 0.08 (0.06, 0.09)                 | 0.33 (0.3, 0.36)                 | 0.21 (0.19, 0.23)                 |
| <b>Sensitivity</b> | 0.01   | 0.8 (0.73, 0.87)               | 0.93 (0.88, 0.97)                 | 0.76 (0.68, 0.83)                | 0.83 (0.76, 0.89)                 |
| <b>Specificity</b> |        | 0.33 (0.3, 0.35)               | 0.1 (0.08, 0.12)                  | 0.4 (0.37, 0.42)                 | 0.29 (0.27, 0.32)                 |
| <b>Sensitivity</b> | 0.03   | 0.63 (0.55, 0.71)              | 0.84 (0.77, 0.9)                  | 0.54 (0.46, 0.63)                | 0.6 (0.51, 0.69)                  |
| <b>Specificity</b> |        | 0.54 (0.51, 0.57)              | 0.29 (0.27, 0.32)                 | 0.61 (0.58, 0.64)                | 0.53 (0.5, 0.55)                  |
| <b>Sensitivity</b> | 0.05   | 0.54 (0.45, 0.62)              | 0.7 (0.61, 0.78)                  | 0.49 (0.4, 0.58)                 | 0.54 (0.45, 0.62)                 |
| <b>Specificity</b> |        | 0.64 (0.61, 0.66)              | 0.41 (0.39, 0.44)                 | 0.71 (0.68, 0.73)                | 0.64 (0.61, 0.67)                 |
| <b>Sensitivity</b> | 0.1    | 0.46 (0.37, 0.54)              | 0.57 (0.48, 0.66)                 | 0.39 (0.31, 0.48)                | 0.43 (0.34, 0.52)                 |
| <b>Specificity</b> |        | 0.75 (0.72, 0.77)              | 0.56 (0.53, 0.59)                 | 0.83 (0.81, 0.85)                | 0.79 (0.77, 0.81)                 |
| <b>Sensitivity</b> | 0.2    | 0.39 (0.31, 0.48)              | 0.46 (0.37, 0.54)                 | 0.32 (0.24, 0.4)                 | 0.34 (0.25, 0.42)                 |
| <b>Specificity</b> |        | 0.86 (0.84, 0.88)              | 0.74 (0.72, 0.77)                 | 0.9 (0.88, 0.92)                 | 0.88 (0.86, 0.9)                  |
| <b>PVP</b>         | 0.001  | 0.1 (0.08, 0.11)               | 0.09 (0.08, 0.11)                 | 0.1 (0.08, 0.11)                 | 0.1 (0.08, 0.11)                  |
| <b>PVN</b>         |        | 0.95 (0.9, 0.99)               | 0.83 (0.5, 1)                     | 0.95 (0.91, 0.99)                | 0.95 (0.89, 0.99)                 |
| <b>PVP</b>         | 0.003  | 0.1 (0.08, 0.12)               | 0.09 (0.08, 0.11)                 | 0.1 (0.08, 0.12)                 | 0.1 (0.08, 0.11)                  |
| <b>PVN</b>         |        | 0.95 (0.93, 0.98)              | 0.94 (0.88, 0.99)                 | 0.95 (0.92, 0.98)                | 0.93 (0.88, 0.97)                 |
| <b>PVP</b>         | 0.005  | 0.1 (0.09, 0.12)               | 0.1 (0.08, 0.11)                  | 0.11 (0.09, 0.13)                | 0.1 (0.08, 0.12)                  |
| <b>PVN</b>         |        | 0.95 (0.92, 0.97)              | 0.95 (0.9, 0.99)                  | 0.95 (0.92, 0.97)                | 0.94 (0.9, 0.97)                  |
| <b>PVP</b>         | 0.007  | 0.11 (0.09, 0.13)              | 0.1 (0.08, 0.11)                  | 0.11 (0.09, 0.13)                | 0.1 (0.09, 0.12)                  |
| <b>PVN</b>         |        | 0.94 (0.92, 0.97)              | 0.95 (0.9, 0.99)                  | 0.94 (0.92, 0.96)                | 0.95 (0.92, 0.97)                 |
| <b>PVP</b>         | 0.01   | 0.11 (0.09, 0.13)              | 0.1 (0.08, 0.11)                  | 0.11 (0.09, 0.14)                | 0.11 (0.09, 0.13)                 |
| <b>PVN</b>         |        | 0.94 (0.92, 0.96)              | 0.93 (0.89, 0.97)                 | 0.94 (0.92, 0.96)                | 0.94 (0.92, 0.97)                 |
| <b>PVP</b>         | 0.03   | 0.12 (0.1, 0.15)               | 0.11 (0.09, 0.13)                 | 0.13 (0.1, 0.15)                 | 0.12 (0.09, 0.14)                 |
| <b>PVN</b>         |        | 0.93 (0.92, 0.95)              | 0.95 (0.92, 0.97)                 | 0.93 (0.91, 0.95)                | 0.93 (0.91, 0.95)                 |
| <b>PVP</b>         | 0.05   | 0.13 (0.1, 0.16)               | 0.11 (0.09, 0.13)                 | 0.15 (0.11, 0.18)                | 0.13 (0.1, 0.16)                  |
| <b>PVN</b>         |        | 0.93 (0.91, 0.95)              | 0.93 (0.91, 0.95)                 | 0.93 (0.91, 0.95)                | 0.93 (0.91, 0.95)                 |
| <b>PVP</b>         | 0.1    | 0.16 (0.12, 0.2)               | 0.12 (0.09, 0.14)                 | 0.19 (0.14, 0.24)                | 0.17 (0.13, 0.22)                 |
| <b>PVN</b>         |        | 0.93 (0.91, 0.95)              | 0.93 (0.91, 0.94)                 | 0.93 (0.91, 0.94)                | 0.93 (0.92, 0.95)                 |
| <b>PVP</b>         | 0.2    | 0.22 (0.17, 0.28)              | 0.15 (0.12, 0.19)                 | 0.25 (0.18, 0.32)                | 0.22 (0.16, 0.28)                 |
| <b>PVN</b>         |        | 0.93 (0.92, 0.95)              | 0.93 (0.91, 0.95)                 | 0.93 (0.91, 0.94)                | 0.93 (0.91, 0.94)                 |
| <b>AUC</b>         |        | 0.65 (0.59, 0.70)              | 0.63 (0.57, 0.68)                 | 0.64 (0.59, 0.7)                 | 0.64 (0.58, 0.7)                  |
| <b>O/E</b>         |        | 125/146.45 = 0.85<br>(0.71, 1) | 125/228.94 = 0.55<br>(0.46, 0.64) | 125/113.98 = 1.10<br>(0.91, 1.3) | 125/135.37 = 0.92<br>(0.77, 1.09) |

**Supplement Table 2:** Numbers of referrals made at each stage using a two-stage approach, as compared to using BRCAPRO only on all probands for CGN+MDA data. For each combination of  $c_1$  and  $c_2$ , three numbers are provided – number of probands with first stage probability exceeding  $c_1$  ( $n_1$ ), out of  $n_1$ , the number of probands with second stage probability exceeding  $c_2$  ( $n_2$ ), and out of  $n_2$ , the number of probands tested positive for BRCA mutation.

|                             |           | <b>BRCAPROLYTE</b>          |          |          |           | <b>BRCAPROLYTE-Plus</b>     |          |          |           |      |
|-----------------------------|-----------|-----------------------------|----------|----------|-----------|-----------------------------|----------|----------|-----------|------|
|                             |           | <b><math>c_2</math> (%)</b> |          |          |           | <b><math>c_2</math> (%)</b> |          |          |           |      |
|                             |           | <b>1</b>                    | <b>3</b> | <b>5</b> | <b>10</b> | <b>1</b>                    | <b>3</b> | <b>5</b> | <b>10</b> |      |
| <b><math>c_1</math> (%)</b> | <b>1</b>  | 2584                        | 2584     | 2584     | 2584      | <b>1</b>                    | 2003     | 2003     | 2003      | 2003 |
|                             |           | 2070                        | 1624     | 1361     | 1036      |                             | 1909     | 1582     | 1340      | 1029 |
|                             |           | 548                         | 498      | 458      | 414       |                             | 532      | 494      | 456       | 413  |
|                             | <b>3</b>  | 2255                        | 2255     | 2255     | 2255      | <b>3</b>                    | 1477     | 1477     | 1477      | 1477 |
|                             |           | 2012                        | 1620     | 1359     | 1035      |                             | 1470     | 1429     | 1280      | 1006 |
|                             |           | 541                         | 496      | 456      | 413       |                             | 471      | 468      | 444       | 409  |
|                             | <b>5</b>  | 2028                        | 2028     | 2028     | 2028      | <b>5</b>                    | 1244     | 1244     | 1244      | 1244 |
|                             |           | 1881                        | 1576     | 1350     | 1031      |                             | 1240     | 1231     | 1191      | 980  |
|                             |           | 526                         | 494      | 456      | 413       |                             | 438      | 438      | 429       | 401  |
|                             | <b>10</b> | 1632                        | 1632     | 1632     | 1632      | <b>10</b>                   | 903      | 903      | 903       | 903  |
|                             |           | 1559                        | 1410     | 1276     | 1023      |                             | 902      | 902      | 898       | 867  |
|                             |           | 490                         | 472      | 447      | 412       |                             | 379      | 379      | 378       | 372  |
|                             |           | <b>BRCAPROLYTE-Simple</b>   |          |          |           | <b>BRCAPRO</b>              |          |          |           |      |
|                             |           | <b><math>c_2</math> (%)</b> |          |          |           | <b><math>c_2</math> (%)</b> |          |          |           |      |
|                             |           | <b>1</b>                    | <b>3</b> | <b>5</b> | <b>10</b> | <b>1</b>                    | <b>3</b> | <b>5</b> | <b>10</b> |      |
| <b><math>c_1</math> (%)</b> | <b>1</b>  | 2300                        | 2300     | 2300     | 2300      |                             | 2070     | 1624     | 1361      | 1036 |
|                             |           | 2044                        | 1619     | 1359     | 1036      |                             | 548      | 498      | 458       | 414  |
|                             |           | 546                         | 497      | 457      | 414       |                             |          |          |           |      |
|                             | <b>3</b>  | 1789                        | 1789     | 1789     | 1789      |                             |          |          |           |      |
|                             |           | 1725                        | 1536     | 1330     | 1024      |                             |          |          |           |      |
|                             |           | 509                         | 483      | 454      | 412       |                             |          |          |           |      |
|                             | <b>5</b>  | 1522                        | 1522     | 1522     | 1522      |                             |          |          |           |      |
|                             |           | 1494                        | 1415     | 1299     | 1018      |                             |          |          |           |      |
|                             |           | 484                         | 472      | 450      | 412       |                             |          |          |           |      |
|                             | <b>10</b> | 1167                        | 1167     | 1167     | 1167      |                             |          |          |           |      |
|                             |           | 1160                        | 1141     | 1100     | 978       |                             |          |          |           |      |
|                             |           | 426                         | 423      | 415      | 399       |                             |          |          |           |      |

**Supplement Table 3:** Numbers of referrals made at each stage using a two-stage approach, as compared to using BRCAPro only on all probands for NWH data. For each combination of  $c_1$  and  $c_2$ , three numbers are provided – number of probands with first stage probability exceeding  $c_1$  ( $n_1$ ), out of  $n_1$ , the number of probands with second stage probability exceeding  $c_2$  ( $n_2$ ), and out of  $n_2$ , the number of probands tested positive for BRCA mutation.

|                             |           | <b>BRCAPROLYTE</b>          |          |          |           | <b>BRCAPROLYTE-Plus</b>     |          |          |           |     |
|-----------------------------|-----------|-----------------------------|----------|----------|-----------|-----------------------------|----------|----------|-----------|-----|
|                             |           | <b><math>c_2</math> (%)</b> |          |          |           | <b><math>c_2</math> (%)</b> |          |          |           |     |
|                             |           | <b>1</b>                    | <b>3</b> | <b>5</b> | <b>10</b> | <b>1</b>                    | <b>3</b> | <b>5</b> | <b>10</b> |     |
| <b><math>c_1</math> (%)</b> | <b>1</b>  | 1212                        | 1212     | 1212     | 1212      | <b>1</b>                    | 831      | 831      | 831       | 831 |
|                             |           | 921                         | 641      | 509      | 363       |                             | 795      | 623      | 500       | 356 |
|                             |           | 100                         | 79       | 67       | 57        |                             | 91       | 77       | 66        | 56  |
|                             | <b>3</b>  | 969                         | 969      | 969      | 969       | <b>3</b>                    | 540      | 540      | 540       | 540 |
|                             |           | 836                         | 636      | 504      | 360       |                             | 540      | 510      | 450       | 339 |
|                             |           | 98                          | 79       | 67       | 57        |                             | 68       | 67       | 61        | 53  |
|                             | <b>5</b>  | 803                         | 803      | 803      | 803       | <b>5</b>                    | 416      | 416      | 416       | 416 |
|                             |           | 729                         | 592      | 500      | 357       |                             | 416      | 414      | 389       | 312 |
|                             |           | 83                          | 76       | 67       | 57        |                             | 61       | 61       | 58        | 51  |
|                             | <b>10</b> | 608                         | 608      | 608      | 608       | <b>10</b>                   | 256      | 256      | 256       | 256 |
| 585                         |           | 513                         | 448      | 347      |           | 256                         | 256      | 252      | 239       |     |
| 71                          |           | 68                          | 61       | 54       |           | 49                          | 49       | 48       | 47        |     |
|                             |           | <b>BRCAPROLYTE-Simple</b>   |          |          |           | <b>BRCAPRO</b>              |          |          |           |     |
|                             |           | <b><math>c_2</math> (%)</b> |          |          |           | <b><math>c_2</math> (%)</b> |          |          |           |     |
|                             |           | <b>1</b>                    | <b>3</b> | <b>5</b> | <b>10</b> | <b>1</b>                    | <b>3</b> | <b>5</b> | <b>10</b> |     |
| <b><math>c_1</math> (%)</b> | <b>1</b>  | 964                         | 964      | 964      | 964       |                             | 922      | 642      | 510       | 363 |
|                             |           | 849                         | 635      | 506      | 362       |                             | 100      | 79       | 67        | 57  |
|                             |           | 99                          | 78       | 67       | 57        |                             |          |          |           |     |
|                             | <b>3</b>  | 651                         | 651      | 651      | 651       |                             |          |          |           |     |
|                             |           | 634                         | 542      | 470      | 349       |                             |          |          |           |     |
|                             |           | 74                          | 72       | 64       | 55        |                             |          |          |           |     |
|                             | <b>5</b>  | 506                         | 506      | 506      | 506       |                             |          |          |           |     |
|                             |           | 502                         | 468      | 417      | 326       |                             |          |          |           |     |
|                             |           | 67                          | 67       | 60       | 53        |                             |          |          |           |     |
|                             | <b>10</b> | 309                         | 309      | 309      | 309       |                             |          |          |           |     |
| 307                         |           | 303                         | 290      | 253      |           |                             |          |          |           |     |
| 54                          |           | 54                          | 52       | 48       |           |                             |          |          |           |     |
